# Supplementary material for: Antibody Conjugates Bispecific for Pollen Allergens and ICAM-1 with Potential to Prevent Epithelial Allergen Transmigration and Rhinovirus Infection
Source: MDPI journal article supplement (doi:10.3390/ijms24032725), 2023-02-01
Supplement: s1 [file s1]

## Supplemental tables and figures

**Table S1.** Inhibition of patients' IgE binding to Phl p 5 and Phl p 2 that had been pre-incubated with Phl p 5- or Phl p 2-specific IgG<sub>1</sub> and Phl p 5- or Phl p 2-specific rabbit serum.

| Phl p 5     |                          |                          |              |                |                |              |
|-------------|--------------------------|--------------------------|--------------|----------------|----------------|--------------|
|             | Phl p 5 IgG <sub>1</sub> | Phl p 2 IgG <sub>1</sub> | Inhibition % |                |                | Inhibition % |
|             |                          |                          | to Phl p 5   | Phl p 5 rabbit | Phl p 2 rabbit | to Phl p 5   |
| Patient 8   | 1.470                    | 1.388                    | 0.0          | 0.106          | 1.595          | 93.4         |
| Patient 9   | 0.532                    | 0.601                    | 11.4         | 0.223          | 0.666          | 66.6         |
| Patient 10  | 0.355                    | 0.366                    | 2.9          | 0.218          | 0.371          | 41.2         |
| Patient 11  | 0.401                    | 0.443                    | 9.6          | 0.233          | 0.472          | 50.7         |
| Patient 12  | 0.562                    | 0.640                    | 12.1         | 0.215          | 0.679          | 68.3         |
| <b>Mean</b> |                          |                          | 7.2          |                |                | 64.0         |

  

| Phl p 2     |                          |                          |              |                |                |              |
|-------------|--------------------------|--------------------------|--------------|----------------|----------------|--------------|
|             | Phl p 2 IgG <sub>1</sub> | Phl p 5 IgG <sub>1</sub> | Inhibition % |                |                | Inhibition % |
|             |                          |                          | to Phl p 2   | Phl p 2 rabbit | Phl p 5 rabbit | to Phl p 2   |
| Patient 8   | 0.222                    | 0.913                    | 75.7         | 0.278          | 0.898          | 69.0         |
| Patient 9   | 0.340                    | 0.950                    | 64.2         | 0.401          | 0.937          | 57.1         |
| Patient 10  | 0.238                    | 0.548                    | 56.6         | 0.275          | 0.486          | 43.3         |
| Patient 11  | 0.467                    | 0.772                    | 39.5         | 0.326          | 0.771          | 57.7         |
| Patient 12  | 0.633                    | 0.828                    | 23.5         | 0.316          | 0.831          | 62.0         |
| <b>Mean</b> |                          |                          | 51.9         |                |                | 57.8         |

ELISA plate-bound Phl p 5 and Phl p 2 had been pre-incubated each with 20-fold excess of non-blocking and blocking allergen-specific monoclonal antibodies (i.e., Phl p 5 IgG<sub>1</sub> and Phl p 2 IgG<sub>1</sub>) or polyclonal rabbit sera (Phl p 5 rabbit and Phl p 2 rabbit). Allergens were subsequently exposed to sera of 5 grass pollen allergic patients. OD values corresponding to IgE reactivity to Phl p 5 and Phl p 2 are shown as means of triplets. Reduction of patients' IgE binding to Phl p 5 and Phl p 2 after pre-incubation with non-blocking compared to blocking monoclonal or polyclonal antibodies is given as percentage in the 4th and 7th column.

**Table S2.** Antibodies and fluorophores used in ELISA, flow cytometry (FC) and immunofluorescence microscopy (IFM).

| Antibody or fluorophore                                                   | Conjugate            | Company                  | Clone      | Cat. no    | used in   |
|---------------------------------------------------------------------------|----------------------|--------------------------|------------|------------|-----------|
| Goat anti-human IgG F(ab') <sub>2</sub>                                   | Alkaline Phosphatase | Thermo Fisher Scientific | polyclonal | 31312      | ELISA     |
| Rat anti-mouse IgG <sub>1</sub>                                           | Alkaline Phosphatase | BD Pharmingen            | X56        | 557272     | ELISA     |
| Mouse anti-human IgE                                                      | Alkaline Phosphatase | BD Pharmingen            |            | 555859     | ELISA     |
| Mouse IgG, κ anti-human ICAM-1                                            | Biotin               | LifeSpanBioSciences      | 15.2       | LS-C134489 | ELISA, FC |
| Mouse IgG1, κ anti-human IgA <sub>1</sub> /A <sub>2</sub> isotype control | Biotin               | BD Pharmingen            | G20-359    | 555884     | FC        |
| Dy Light 488                                                              | Streptavidin         | Invitrogen               |            | SE241784   | FC        |

|                                                      |                 |                         |            |             |     |
|------------------------------------------------------|-----------------|-------------------------|------------|-------------|-----|
| Phl p 5-specific rabbit serum                        | unconjugated    | Charles River           | polyclonal |             | FC  |
| Pre-immune rabbit serum                              | unconjugated    | Charles River           | polyclonal |             | FC  |
| Goat anti-rabbit IgG                                 | Alexa Fluor 405 | Invitrogen              | polyclonal | A31556      | FC  |
| Fixable viability dye                                | eFluor 780      | ThermoFisher Scientific |            | 65-0865-14  | FC  |
| Goat anti-mouse IgG                                  | Alexa Fluor 488 | Invitrogen              | polyclonal | A11001      | IFM |
| Goat anti-rabbit IgG                                 | Alexa Fluor 568 | Invitrogen              | polyclonal | A11011      | IFM |
| DAPI, 4',6-diamidino-2-phenylindole, dihydrochloride | unconjugated    | Roche Diagnostics GmbH  |            | 10236276001 | IFM |
| DRAQ5                                                | unconjugated    | ThermoFisher Scientific |            | 62254       | IFM |

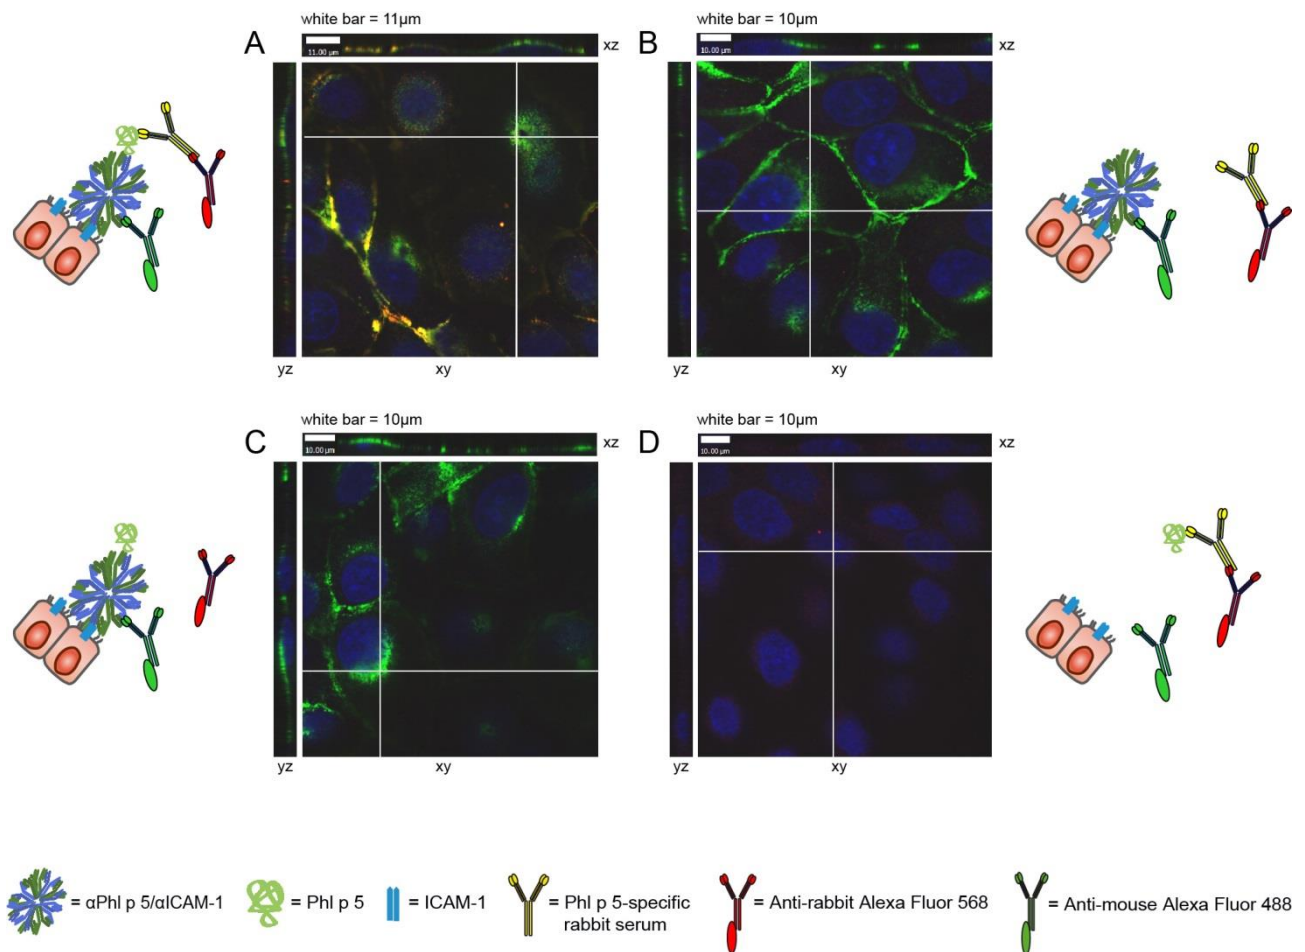

**Figure S1.** Phl p 5 is captured by surface immobilized  $\alpha$ Phl p 5/ $\alpha$ ICAM-1 conjugates. 16HBE14o- cells were incubated with  $\alpha$ Phl p 5/ $\alpha$ ICAM-1 (A,B,C) and/or Phl p 5 (A,C,D) and after cell fixation, permeabilized with saponin. Bound conjugates or Phl p 5 were detected with Alexa Fluor 488-labeled anti-mouse antibodies (green) and Alexa Fluor 568-labeled anti-rabbit antibodies (red), respectively. Nuclei were visualized with DRAQ5 (blue), and merged images are shown. Yellow coloring (top left) indicates co-localization of  $\alpha$ Phl p 5/ $\alpha$ ICAM-1 and Phl p 5. Scale bars are 10  $\mu$ m or 11  $\mu$ m. Confocal microscopy images show xy-axes, xz-axes and yz-axes.
